# Supplementary material for: HMAGLOFDB v1.0 – a comprehensive and version controlled database of glacier lake outburst floods in high mountain Asia
Source: Copernicus journal article supplement (doi:10.5194/essd-2022-395), 2023-01-11
Supplement: Supplementary file [file essd-2022-395-AC1-supplement.pdf]

**CC1: 'Comment on essd-2022-395', Jonathan Carrivick, 12 Jan 2023**

<https://doi.org/10.5194/essd-2022-395-CC1>

1. Considerable amounts of literature, governmental records, international databases and media reports were analysed by Carrivick and Tweed (2016) and they compiled number, volume, discharge, and damage and societal impact quantities (e.g., they report at least 6300 deaths from GLOFs across Himalaya) where possible and for hundreds of events across the Himalaya. They concluded the societal impact of GLOFs is greatest in central Asia of any world region. Their datasets are freely available. So, I really think you need to compare to, and refer to their study and its findings!

Carrivick, J.L. and Tweed, F.S., 2016. A global assessment of the societal impacts of glacier outburst floods. *Global and Planetary Change*, 144, pp.1-16. <https://doi.org/10.1016/j.gloplacha.2016.07.001>

**Thank you for your comment. The study by Carrivick and Tweed (2016) was instrumental in the development of the HMA GLOF database and has contributed over 5.4% of the database recorded events.**
